# Supplementary material for: Genome-Wide Analysis of Histidine Repeats Reveals Their Role in the Localization of Human Proteins to the Nuclear Speckles Compartment
Source: PLOS journal article supplement (doi:10.1371/journal.pgen.1000397), 2009-03-06

**A**

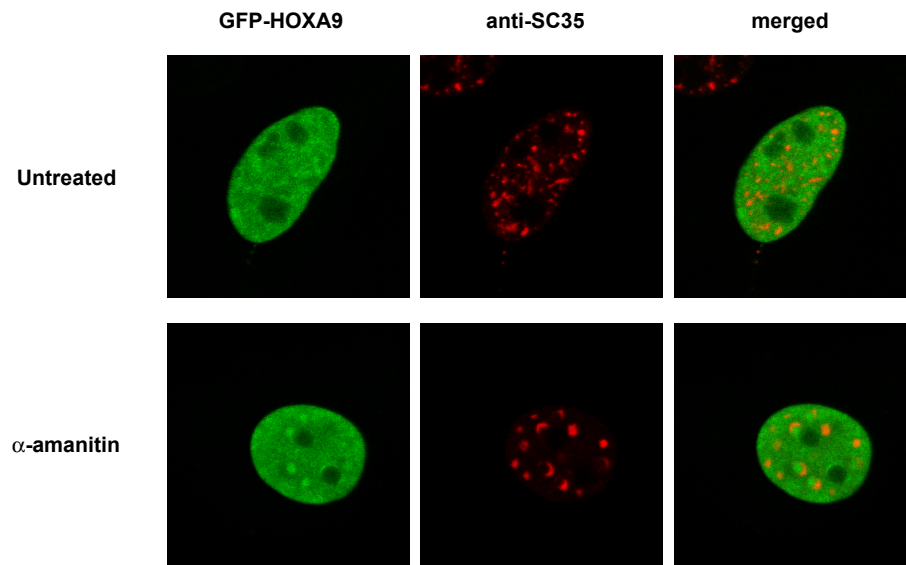

**B**

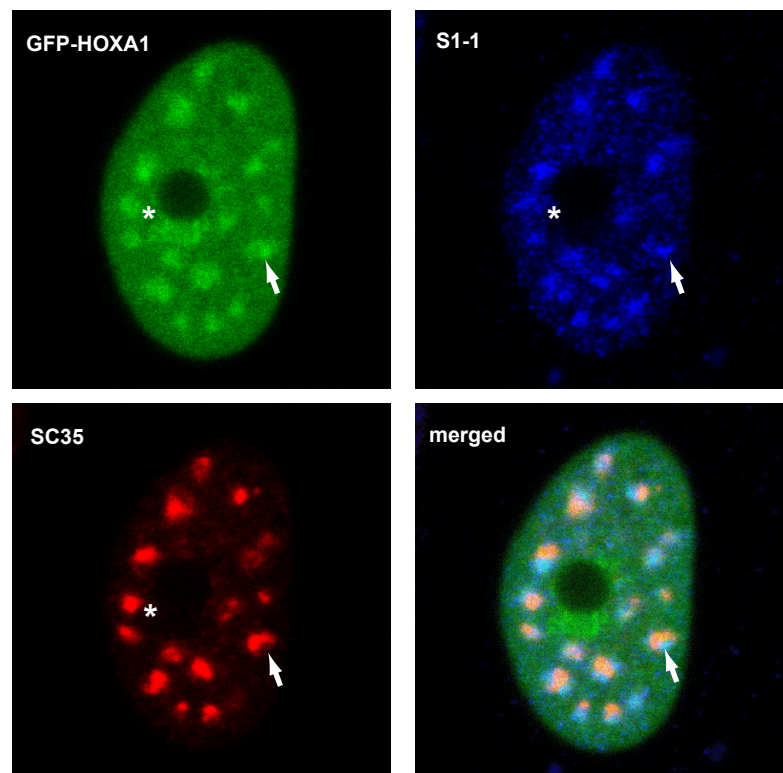

Supplement: S6 (10.1371/journal.pgen.1000397.s006) [file journal.pgen.1000397.s006]
