# Supplementary material for: Genome-Wide Analysis of Histidine Repeats Reveals Their Role in the Localization of Human Proteins to the Nuclear Speckles Compartment
Source: PLOS journal article supplement (doi:10.1371/journal.pgen.1000397), 2009-03-06

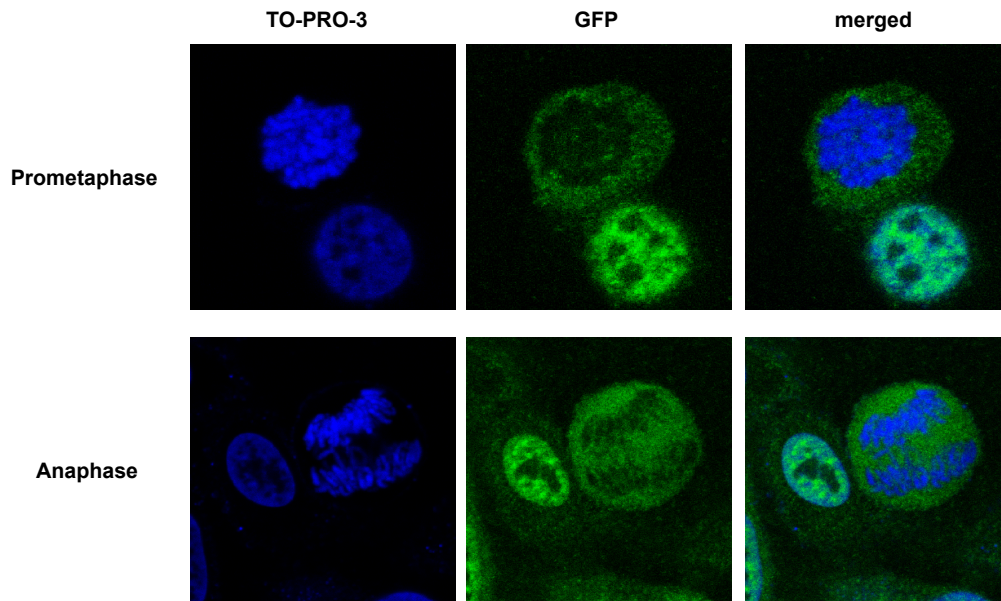

Supplement: S9 (10.1371/journal.pgen.1000397.s009) [file journal.pgen.1000397.s009]
